# Supplementary material for: Room temperature thiosulfate ion redox reaction-driven synthesis of a robust porous copper–cobalt–sulfur–oxygen nanowire coating on copper foam for highly-efficient and low-cost oxygen evolution reaction
Source: Royal Society of Chemistry journal article supplement (doi:10.1039/c9cc03794b), 2019-01-01
Supplement: c9cc03794b1.pdf [file c9cc03794b1.pdf]

## **Electronic Supplementary Information**

### **Room temperature thiosulfate ion redox reaction-driven robust and porous copper-cobalt-sulfur-oxygen nanowire coating on copper foam for highly-efficient and low-cost oxygen evolution reaction**

Yanqing Wang<sup>a</sup>, Yuemeng Li<sup>a</sup>, Liping Ding<sup>b</sup>, Aaron Ong<sup>a</sup>, Jun Ding<sup>a,\*</sup>

<sup>a</sup> Department of Materials Science & Engineering, National University of Singapore, 117575,

Singapore

<sup>b</sup> School of Chemistry and Chemical Engineering, Nantong University, Nantong 226007, China

## **Experimental Section**

### **Materials**

Cu foam(CF) conductive support was bought from Latech Scientific Supply Pte. Ltd.  $\text{CoSO}_4 \cdot 7\text{H}_2\text{O}$ ,  $\text{Na}_2\text{S}_2\text{O}_3 \cdot 5\text{H}_2\text{O}$ , KOH,  $\text{H}_2\text{SO}_4$ (95-98wt%) and ethyl alcohol were purchased from Sigma-Aldrich Chemical Reagent Co.

### **Preparation of Cu-Co-S-O nanowire coating(Cu-Co-S-O NWC)**

Cu-Co-S-O nanowire coating(Cu-Co-S-O NWC) was fabricated as follows. In a typical synthesis, a piece of CF( $1 \times 1 \text{cm}^2$ ) was dipped into ethyl alcohol at room temperature for 2 min to remove the oil. To remove the oxide of CF surface, then CF was immersed in 5 volume%  $\text{H}_2\text{SO}_4$  for 2min at room temperature. Finally, CF was dipped into thiosulfate metal solution for 2h at room temperature. Thiosulfate metal solution contains 140g/L  $\text{Na}_2\text{S}_2\text{O}_3 \cdot 5\text{H}_2\text{O}$  and 45g/L  $\text{CoSO}_4 \cdot 7\text{H}_2\text{O}$ . Notably, CF was cleaned by deionized water for a few times among the above two processes. At last, the mass loading of catalyst is about  $2.23 \text{ mg/cm}^2$ .

### **Characterizations**

ZEISS SEM Supra 40 was used to observe the microscopic morphology of samples. Transmission electron microscopy (TEM) of samples was measured on a JEOL-3010 (300 kV acceleration voltage). XRD patterns were carried out by Bruker D8 Advanced Diffractometer System. X-ray photoelectron spectroscopy (XPS, Kratos AXIS Ultra DLD) was employed to determine the element analysis of surface layer of

samples. ICP (Perkin Elmer Optima 5300DV) test was conducted to detect the element analysis of the bulk phase of samples. The CHNS analyzer (Elementar vario MICRO cube) test was determined to detect the sulphur element analysis of the bulk phase of samples.

### **Electrochemical measurements**

OER process was investigated in a typical three-electrode cell connected to a Bio-logic VMP 3. In this cell, the Cu-Co-S-O NWC/CF, Pt and Hg/HgO were used as the working electrode ( $1 \times 1 \text{ cm}^2$ ), a counter electrode and a reference electrode, respectively. The electrolyte is 1M KOH (pH=14). According to  $E(\text{RHE}) = E_{\text{Hg}/\text{HgO}} + 0.059\text{pH} + 0.098 \text{ V}$ , the measured potentials were all converted to reversible hydrogen electrodes (RHE). LSV curves were measured with the scan rates of 1mV/s. All the tafel slopes of the experiments were derived from LSV curves. Please note that all the electrochemical datas were shown with 100% IR compensation.

**Table S1** element atomic content of the surface layer of Cu-Co-S-O NWC by XPS analysis.

| <b>Element</b> | <b>Atomic/%</b> |
|----------------|-----------------|
| <b>Cu K</b>    | <b>25.2</b>     |
| <b>Co K</b>    | <b>12.1</b>     |
| <b>S K</b>     | <b>5.1</b>      |
| <b>O K</b>     | <b>57.6</b>     |
| <b>Total</b>   | <b>100.00</b>   |

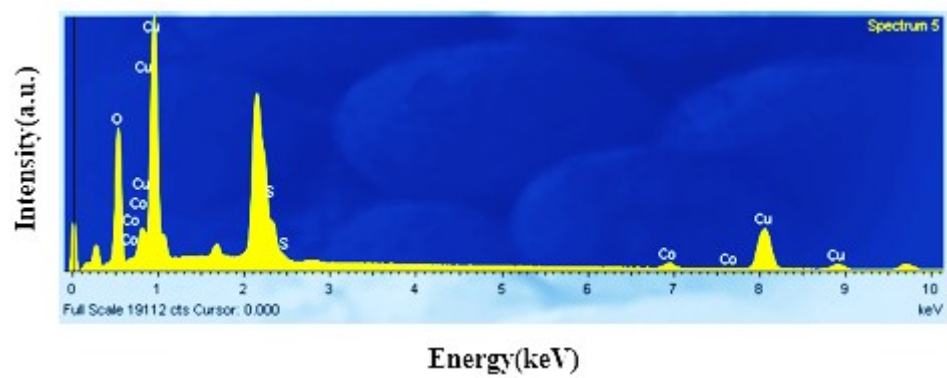

**Figure S1** EDS test results of Cu-Co-S-O NWC

**Table S2.** ICP and CHNS test of the bulk phase of Cu-Co-S-O NWC

| Materials     | Test type | Cu/ppm | Co/ppm | S/%  |
|---------------|-----------|--------|--------|------|
| Cu-Co-S-O NWC | ICP       | 297    | 41     | -    |
|               | CHNS      | -      | -      | 8.49 |

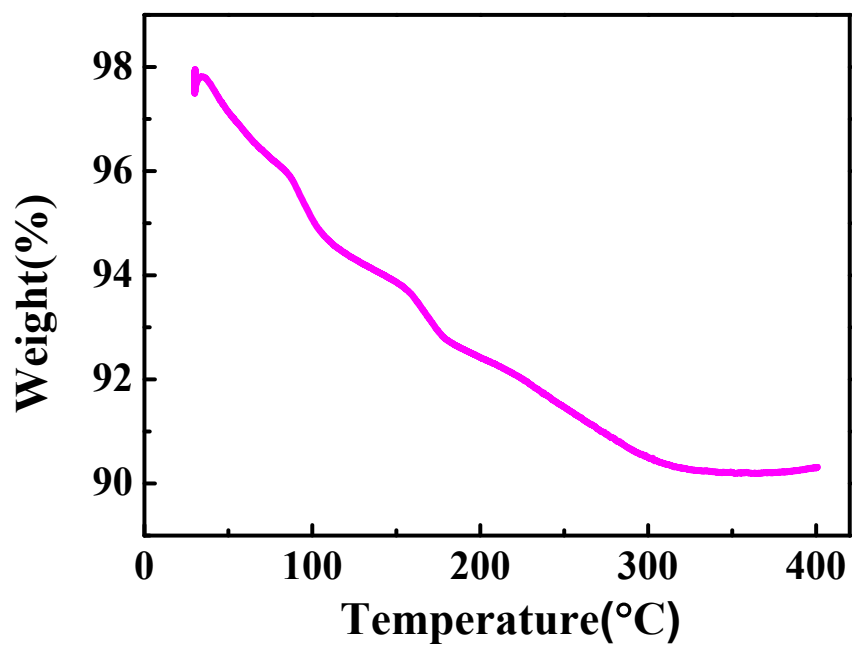

Figure S2 TGA test results of Cu-Co-S-O NWC

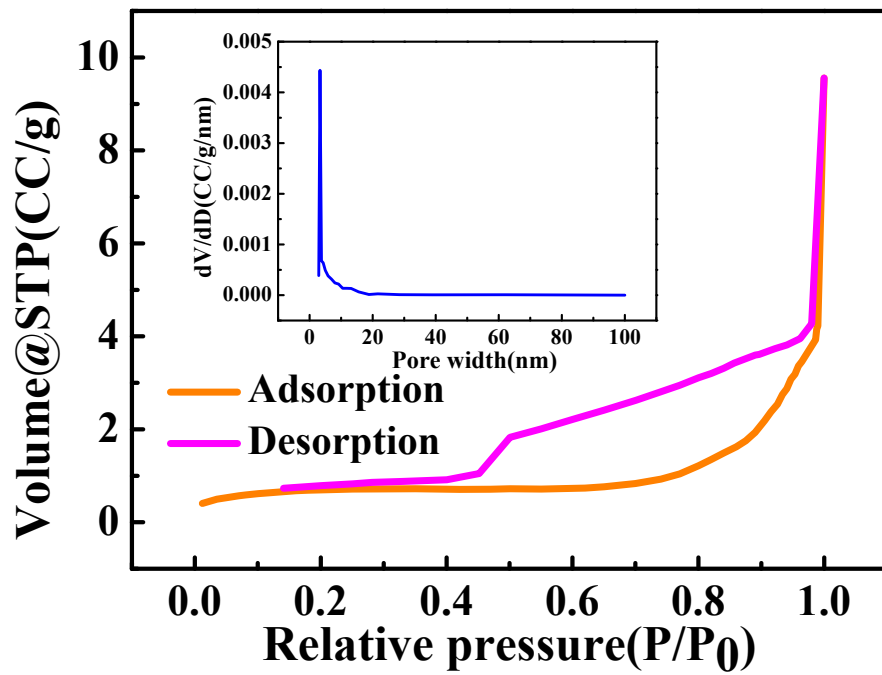

Figure S3 Nitrogen sorption isotherms with the corresponding pore size distribution curve for

Cu-Co-S-O NWC



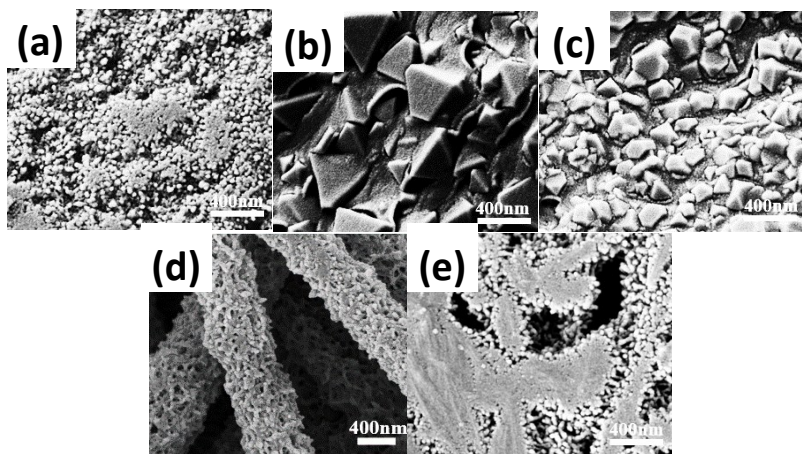

**Figure S4** The influence of different reaction time on the morphology of Cu-Co-S-O NWC (a)

0.25h (b) 0.5h (c) 1h (d) 2h (e) 4h

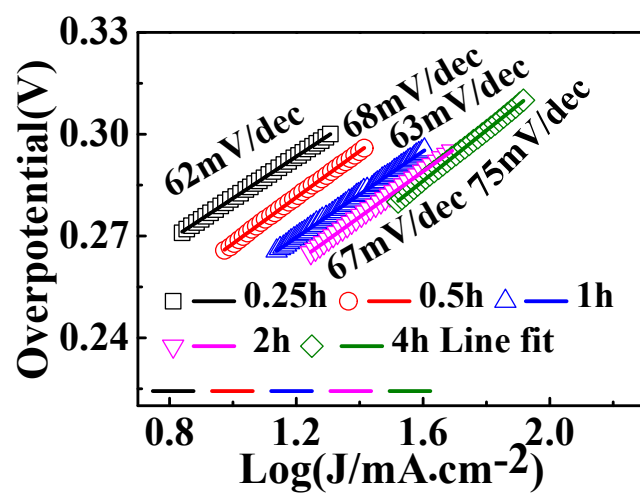

**Figure S5** The tafel performance of Cu-Co-S-O NWC under different reaction time

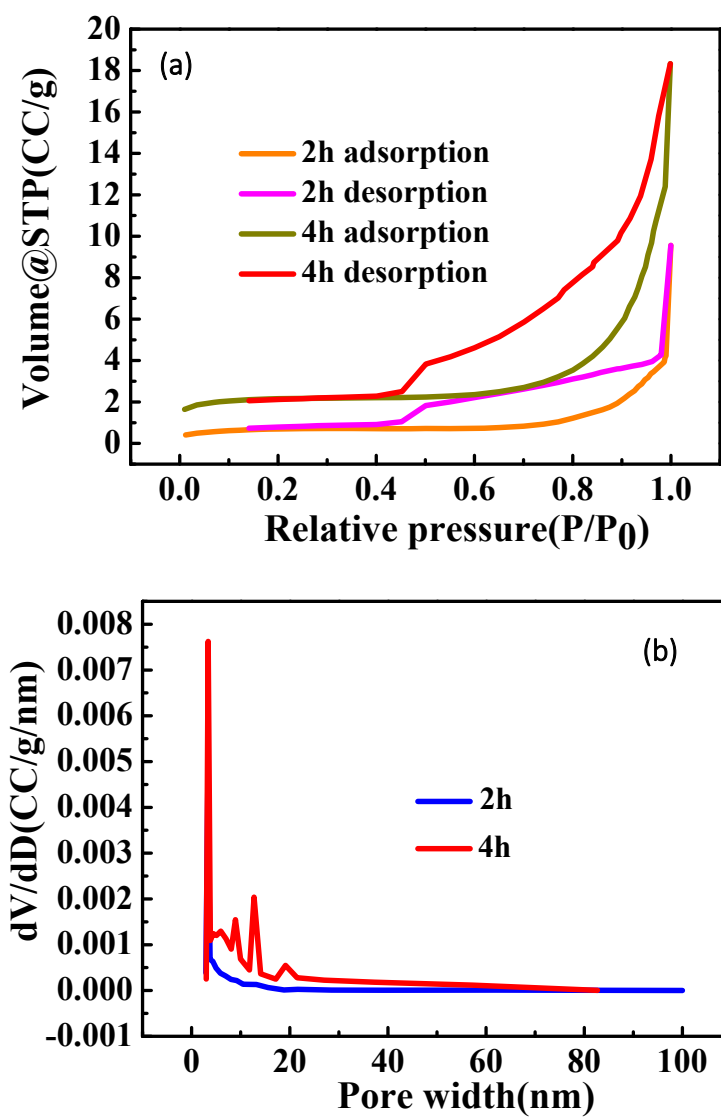

**Figure S6** The comparison of Nitrogen sorption isotherms with the corresponding adsorption desorption curve(a) and pore size distribution curve(b) for Cu-Co-S-O NWC under 2h and 4h reaction time.

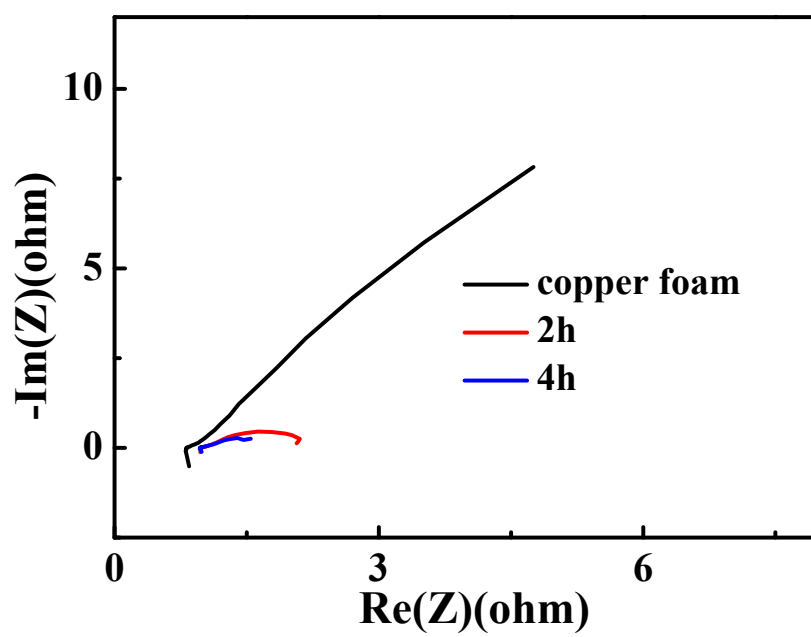

**Figure S7** The comparison of the conductivity of copper foam, Cu-Co-S-O NWC under 2h and 4h reaction time by EIS test at 300mV overpotential.

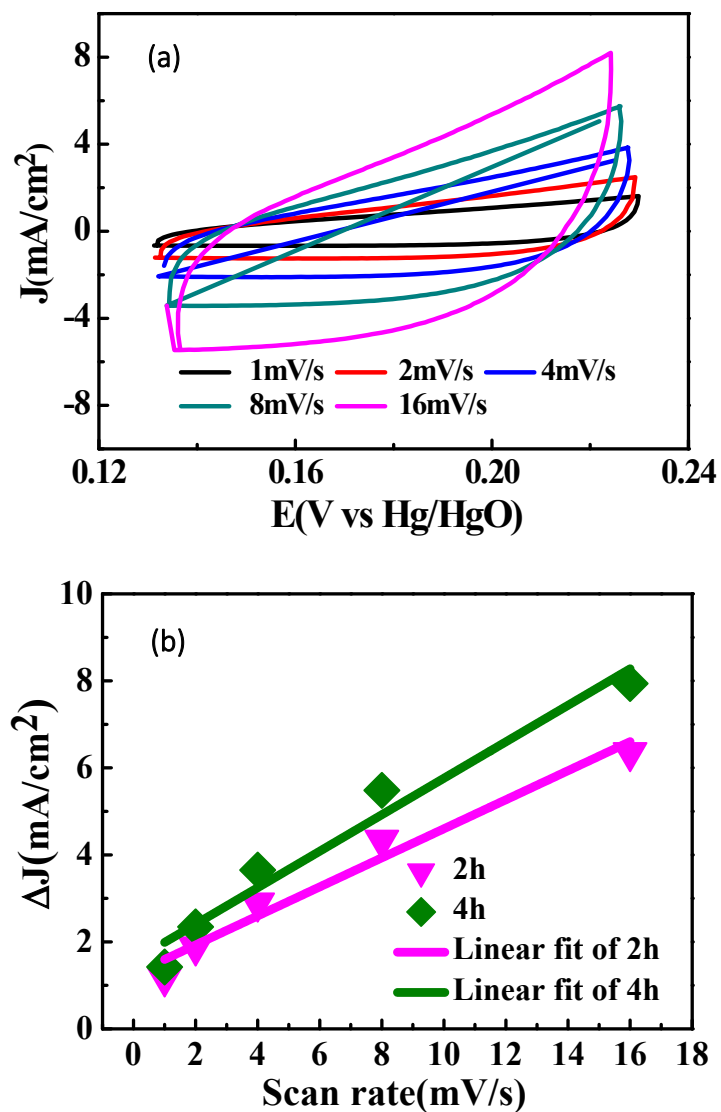

**Figure S8** The ECAS performance of Cu-Co-S-0 coating under different reaction time (a) CV curves at different scan rates in the non-Faradaic capacitance current range for Cu-Co-S-O NWC under 4h (b) corresponding capacitive current differences at 0.18V vs. Hg/HgO as a function of scan rates for Cu-Co-S-O NWC under 2h and 4h.

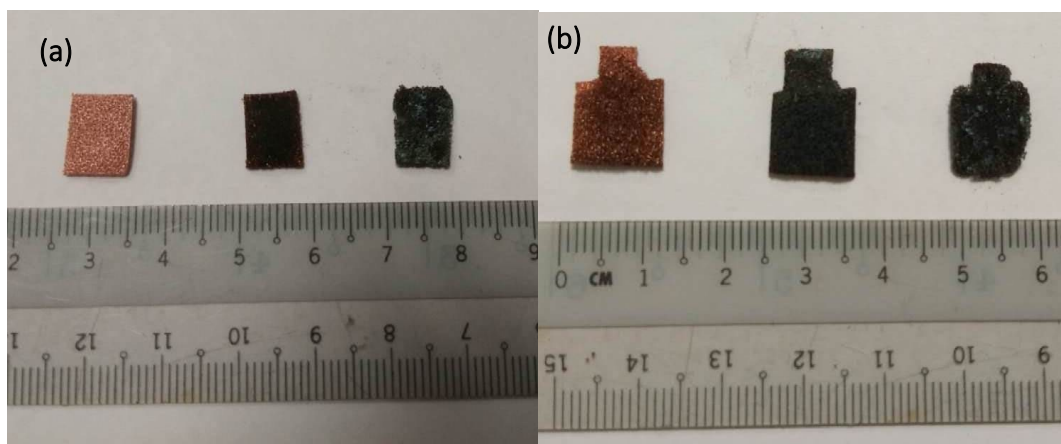

**Figure S9** The digital photographs of different catalytic electrode materials before (a) and after OER (b). Note: the catalytic electrode materials are copper foam, copper foam/Cu-Co-S-O coating under 2h, copper foam/Cu-Co-S-O coating under 4h from left to right direction, respectively.

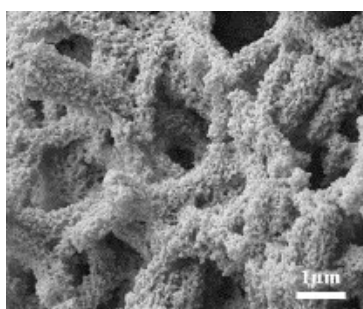

**Figure S10** SEM image of Cu-Co-S-O NWC after OER stability test( $50\text{mA}/\text{cm}^2 \times 10\text{h}$ ).

## Supplementary METHODS

### Calculation of electrochemically active surface area (*ECAS*)

The electrochemical double-layer capacitance  $C_{dl}$  is calculated according to the below equation:

$$C_{dl} = J_c \div \nu \quad (1)$$

The charge current  $J_c$  was derived from CV curves in the non-Faradaic capacitance current range.  $\nu$  is the scan rate as shown in **Fig 3d**.

As shown in **Fig 3e**,  $C_{dl}$  value of Cu-Co-S-O NWC is 333.9mF.

The electrochemically active surface area *ECAS* is calculated as the below equation according to the previous reports:

$$ECAS = C_{dl} \div C_s \quad (2)$$

According to the literatures, the specific capacitance value of the sample  $C_s$  is 0.040 mF/cm<sup>2</sup>, so the *ECAS* of Cu-Co-S-O NWC/CF electrode is 8348 cm<sup>2</sup>.



**Table S3.** Summary of OER catalysis activity of Cu-Co-S-O nanowire coating and as-reported Co-based or Cu-based catalysts in 1M KOH electrolyte

| Catalyst                                                                  | $j$<br>[mA<br>/cm <sup>2</sup> ] | Overpotential [mV]<br>@ $j$ | Tafel slope<br>(mV /dec) | Substrate            | Ref                                          |
|---------------------------------------------------------------------------|----------------------------------|-----------------------------|--------------------------|----------------------|----------------------------------------------|
| Cu-Co-S-O NWC                                                             | 50                               | 296                         | 67                       | CF                   | This work                                    |
|                                                                           | 100                              | 318                         |                          |                      |                                              |
|                                                                           | 200                              | 346                         |                          |                      |                                              |
|                                                                           | 300                              | 366                         |                          |                      |                                              |
| Co@Co <sub>9</sub> S <sub>8</sub>                                         | 10                               | 350                         | 55                       | Cobalt<br>foam       | <i>Chem. Eur. J.</i> 2017, 23, 8749.         |
| A-CoS <sub>4.6</sub> O <sub>0.6</sub> PNCs                                | 10                               | 290                         | 67                       | GCE                  | <i>Angew. Chem. Int. Ed.</i> 2017, 56, 4858. |
| N-doped graphene-CoO                                                      | 10                               | 340                         | 71                       | GCE                  | <i>Energy Environ. Sci.</i> 2014, 7, 609.    |
| Co <sub>3</sub> O <sub>4</sub> /N-doped-graphene                          | 10                               | 310                         | 67                       | NF                   | <i>Nat. Mater.</i> 2011, 10, 780.            |
| Co-Bi NS/G nanosheet                                                      | 10                               | 290                         | 53                       | GCE                  | <i>Angew. Chem. Int. Ed.</i> 2016, 55, 2488. |
| Co-P                                                                      | 50                               | 420                         | 47                       | rotating<br>disk GCE | <i>Angew. Chem. Int. Ed.</i> 2015, 54, 6251. |
| Co <sub>3</sub> O <sub>4</sub> /NiCo <sub>2</sub> O <sub>4</sub><br>DSNCs | 50                               | ~418                        | 88                       | NF                   | <i>J. Am. Chem. Soc.</i> 2015, 137, 5590.    |
| Co <sub>3</sub> O <sub>4</sub> -MTA                                       | 150                              | 360                         | 84                       | NF                   | <i>Angew. Chem. Int. Ed.</i> 2017, 56, 1324. |
| Co <sub>3</sub> O <sub>4</sub> nanoparticles                              | 50                               | ~496                        | -                        | HOPG                 | <i>ACS Catal.</i> 2013, 3, 2497.             |

|                                                                     |     |     |      |           |                                                     |
|---------------------------------------------------------------------|-----|-----|------|-----------|-----------------------------------------------------|
| Co-B@CoO                                                            | 50  | 290 | 78   | TM        | <i>Small</i> 2017,<br>13,<br>1700805.               |
|                                                                     | 100 | 310 |      |           |                                                     |
| Co <sub>3</sub> O <sub>4</sub> nanocrystal /carbon paper            | 50  | 420 | 101  | CFP       | <i>Chem. Commun.</i> 2015, 51, 8066.                |
|                                                                     |     |     |      |           |                                                     |
| Co(OH) <sub>2</sub> -TCNQ/CF                                        | 25  | 276 | 101  | CF        | <i>Adv. Mater.</i> 2018, 30, 1705366                |
|                                                                     | 50  | 315 |      |           |                                                     |
| P-doped-Co@NC-3/1                                                   | 10  | 340 | 85   | GCE       | <i>Adv. Energy Mater.</i> 2018, 8, 1702048          |
| Co <sub>2</sub> V <sub>2</sub> O <sub>7</sub>                       | 10  | 340 | 62   | GCE       | <i>Nano Energy</i> , 2017, 34, 1.                   |
|                                                                     | 100 | 452 |      |           |                                                     |
| Co/VN                                                               | 10  | 320 | 55   | GCE       | <i>Nano Energy</i> , 2017, 34, 1.                   |
|                                                                     | 100 | 385 |      |           |                                                     |
|                                                                     | 200 | 412 |      |           |                                                     |
| HS-CuO/C NDs                                                        | 10  | 286 | 66.3 | Cu foil   | <i>ACS Appl. Mater. Interfaces</i> 2018, 10, 23807. |
|                                                                     | 50  | 422 |      |           |                                                     |
|                                                                     | 100 | 482 |      |           |                                                     |
| 2D CuO nanosheet                                                    | 10  | 350 | 59   | Stainless | <i>J. Mater. Chem. A</i> , 2017, 5, 12747           |
|                                                                     | 50  | 393 |      |           |                                                     |
| CuCo <sub>2</sub> O <sub>4</sub> /NrGO                              | 10  | 360 | 64   | GC-RDE    | <i>J Power Sources</i> , 2015, 281, 243.            |
| Cu <sub>0.3</sub> Co <sub>2.7</sub> O <sub>4</sub> nanochains (0.2) | 10  | 351 | 63.3 | GC-RDE    | <i>ACS Appl. Mater. Interfaces</i> 2017, 9, 22378   |
|                                                                     | 50  | 432 |      |           |                                                     |
| CuCo <sub>2</sub> S <sub>4</sub> nanosheets                         | 10  | 310 | 86   | GCE       | <i>ACS Catal.</i> 2017, 7, 5871.                    |

|                                              |     |     |     |              |                                                    |
|----------------------------------------------|-----|-----|-----|--------------|----------------------------------------------------|
| Co-Cu7S4-0.07                                | 10  | 270 | 130 | Carbon paper | <i>ACS Nano</i><br>2017, 11,<br>12230              |
|                                              | 50  | 397 |     |              |                                                    |
| Fe(OH) <sub>3</sub> :<br>Cu(OH) <sub>2</sub> | 10  | 365 | 42  | CF           | <i>Chem. Commun.</i> ,<br>2016,<br>52, 14470       |
|                                              | 50  | 399 |     |              |                                                    |
|                                              | 100 | 407 |     |              |                                                    |
| CuO-TCNQ/CF                                  | 25  | 317 | 85  | CF           | <i>Chem. Commun.</i> ,<br>2018, 54,<br>1425.       |
|                                              | 50  | 355 |     |              |                                                    |
| Cu <sub>2</sub> S/CF                         | 10  | 290 | 101 | CF           | <i>ACS Catal.</i><br>2018, 8,<br>3859.             |
|                                              | 20  | 336 |     |              |                                                    |
|                                              | 50  | 378 |     |              |                                                    |
| IrO <sub>2</sub> /C(52 wt%)                  | 10  | 250 | 87  | Cu foil      | <i>J. Am. Chem. Soc.</i> ,<br>2014, 136,<br>13925. |

GCE: glassy carbon electrode,  
 NF: nickel foam,  
 HOPG: highly-ordered pyrolytic graphite,  
 CFP: Carbon fiber paper  
 TM: Ti mesh  
 CF: copper foam

## REFERENCES

1. D. Xiong, Q. Zhang, S. M. Thalluri, J. Xu, W. Li, X. Fu and L. Liu, *Chem. Eur. J.* 2017, **23**, 8749.
2. P. Cai, J. Huang, J. Chen and Z. Wen, *Angew. Chem. Int. Ed.* 2017, **56**, 4858.
3. S. Mao, Z. Wen, T. Huang, Y. Hou and J. Chen, *Energy Environ. Sci.*, 2014, **7**, 609.
4. Y. Liang, Y. Li, H. Wang, J. Zhou, J. Wang, T. Regier and H. Dai, *Nat Mater*, 2011, **10**, 780.
5. P. Chen, K. Xu, T. Zhou, Y. Tong, J. Wu, H. Cheng, X. Lu, H. Ding, C. Wu and Y. Xie, *Angew. Chem. Int. Ed.*, 2016, **55**, 2488.
6. N. Jiang, B. You, M. Sheng and Y. Sun, *Angew. Chem. Int. Ed.*, 2015, **54**, 6251.
7. H. Hu, B. Guan, B. Xia and X. W. (D.) Lou, *J. Am. Chem. Soc.*, 2015, **137**, 5590.
8. Y. P. Zhu, T. Y. Ma, M. Jaroniec and S. Z. Qiao, *Angew. Chem. Int. Ed.*, 2017, **56**,

- 1324.
9. J. D. Blakemore, H. B. Gray, J. R. Winkler and A. M. Müller, *ACS Catal.*, 2013, **3**, 2497.
  10. W. Lu, T. Liu, L. Xie, C. Tang, D. Liu, S. Hao, F. Qu, G. Du, Y. Ma, A. M. Asiri, and X. Sun, *small*, 2017, **13**, 1700805.
  11. S. Du, Z. Ren, J. Zhang, J. Wu, W. Xi, J. Zhu and H. Fu, *Chem. Commun.*, 2015, **51**, 8066.
  12. D. Wu, Y. Wei, X. Ren, X. Ji, Y. Liu, X. Guo, Z. Liu, A. M. Asiri, Q. Wei and X. Sun, *Adv. Mater.*, 2018, **30**, 1705366.
  13. Y. Li, B. Jia, Y. Fan, K. Zhu, G. Li and C. -Y. Su, *Adv. Energy Mater.*, 2018, **8**, 1702048.
  14. X. Peng, L. Wang, L. Hu, Y. Li, B. Gao, H. Song, C. Huang, X. Zhang, J. Fu, K. Huo and P. K. Chu, *Nano Energy*, 2017, **34**, 1.
  15. T. Y. Ma, S. Dai, M. Jaroniec and S. Z. Qiao, *J. Am. Chem. Soc.*, 2014, **136**, 13925.
  16. B. Zhang, C. Li, G. Yang, K. Huang, J. Wu, Z. Li, X. Cao, D. Peng, S. Hao and Y. Huang, *ACS Appl. Mater. Interfaces*, 2018, **10**, 23807.
  17. S. M. Pawar, B. S. Pawar, B. Hou, J. Kim, A. T. A. Ahmed, H. S. Chavan, Y. Jo, S. Cho, A. I. Inamdar, J. L. Gunjekar, H. Kim, S. Cha and H. Im, *J. Mater. Chem. A*, 2017, **5**, 12747.
  18. S. K. Bikkarolla and P. Papakonstantinou, *J Power Sources*, 2015, **281**, 243.
  19. A. Karmakar and S. K. Srivastava, *ACS Appl. Mater. Interfaces*, 2017, **9**, 22378.
  20. M. Chauhan, K. P. Reddy, C. S. Gopinath and S. Deka, *ACS Catal.*, 2017, **7**, 5871.
  21. Q. Li, X. Wang, K. Tang, M. Wang, C. Wang and C. Yan, *ACS Nano*, 2017, **11**, 12230.
  22. C. -C. Hou, C. -J. Wang, Q. -Q. Chen, X. -J. Lv, W. -F. Fu and Y. Chen, *Chem. Commun.*, 2016, **52**, 14470.
  23. X. Ren, X. Ji, Y. Wei, D. Wu, Y. Zhang, M. Ma, Z. Liu, A. M. Asiri, Q. Wei and X. Sun, *Chem. Commun.*, 2018, **54**, 1425.
  24. L. He, D. Zhou, Y. Lin, R. Ge, X. Hou, X. Sun and C. Zheng, *ACS Catal.*, 2018, **8**, 3859.
